# Supplementary material for: Improved electrochemical performance of the FeOx(OH)/IF electrode via in situ surface modification with organic naphthoquinone molecules
Source: Royal Society of Chemistry journal article supplement (doi:10.1039/d3nj05485c), 2024-01-01
Supplement: d3nj05485c1.pdf [file d3nj05485c1.pdf]

# Supporting Information

## Improved electrochemical performance of FeO<sub>x</sub>(OH)/IF electrode via *in-situ* surface modification with organic naphthoquinone molecules

Zongyi Shang,<sup>†</sup> Jiayu Li,<sup>†</sup> Yu Chen,<sup>†</sup> Zhigang Zhao,<sup>\*,‡</sup> and Caixia Zhou<sup>\*,†</sup>

<sup>†</sup> Key Laboratory of Pollution Control Chemistry and Environmental Functional Materials for Qinghai-Tibet Plateau of the National Ethnic Affairs Commission, School of Chemistry and Environment, Southwest Minzu University, Chengdu 610041, China

<sup>‡</sup> Key Laboratory of General Chemistry of the National Ethnic Affairs Commission, School of Chemistry and Environment, Southwest Minzu University, Chengdu 610041, China

Corresponding author:

C.X. Zhou: cx\_Zhou123@163.com

Z.G. Zhao: zzg63129@163.com

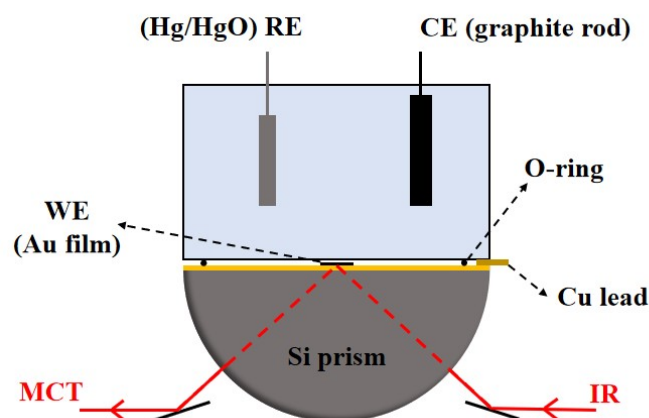

**Fig. S1.** Schematic illustration of the setup for in situ electrochemical ATR infrared absorption spectroscopy.

The *in situ* electrochemical attenuated total-reflection (ATR) infrared absorption spectral measurement (see Fig. S1) was run on a NQ@FeO<sub>x</sub>(OH) active material layer covered on an ca. 60 nm thick Au film chemically deposited on the basal plane of a hemicylindrical Si prism using a Agilent Cary 660 FTIR spectrometer equipped with liquid cooling MCT detector. Then 10  $\mu$ L above-mentioned catalyst ink was transferred onto an electrochemically polished Au film via a pipette. In this structure, an electrochemical three-electrode system was assembled by using the gold nanometer film as the working electrode (WE) and combining the graphite rod counter electrode (CE) and a Hg/HgO electrode as the reference electrode (RE). In this work, all spectra are expressed in absorbance units defined as  $\log(I/I_0)$ , where  $I$  and  $I_0$  represent the absorption intensities at the sample and reference conditions, respectively.

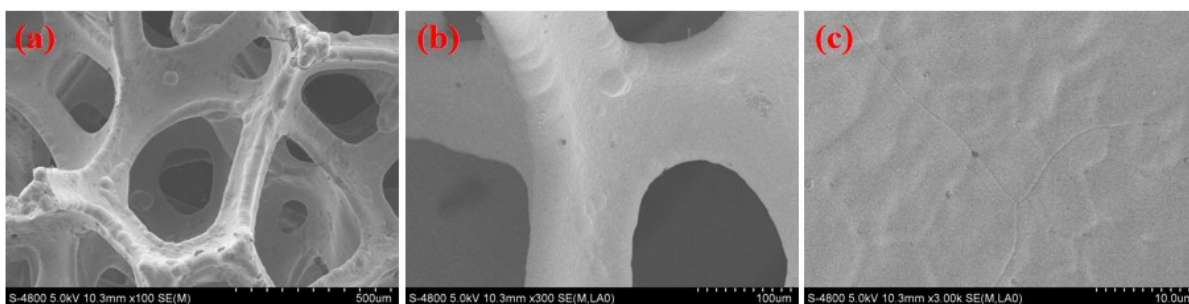

**Fig. S2.** The SEM images of blank iron foam.

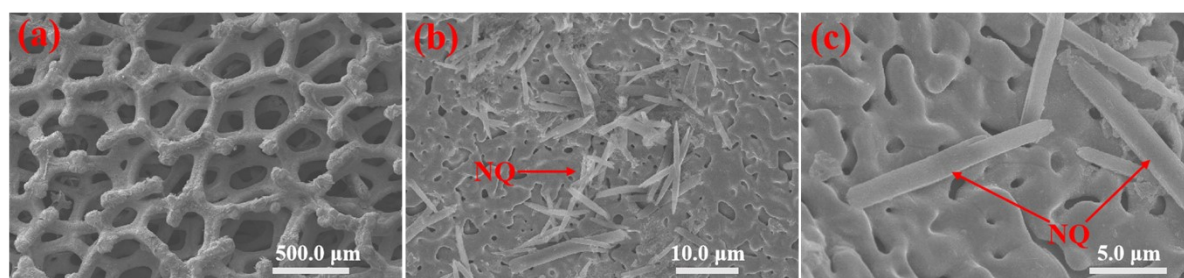

**Fig. S3.** The SEM images of NQ/IF electrodes

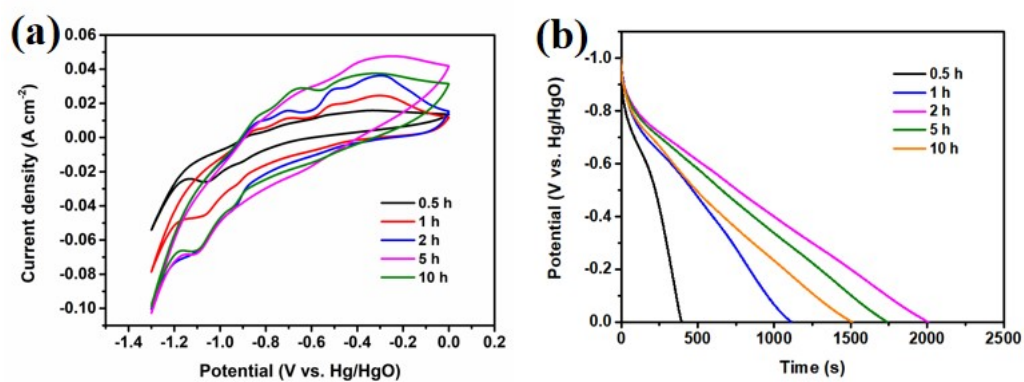

**Fig. S4.** The electrochemical properties of NQ@FeO<sub>x</sub>(OH)/IF electrode produced at different hydrothermal time (0.5 h, 1 h, 2 h, 5 h, and 10 h). (a) CV curves at 10 mV s<sup>-1</sup>, (b) GCD curves at 4 mA cm<sup>-2</sup>.

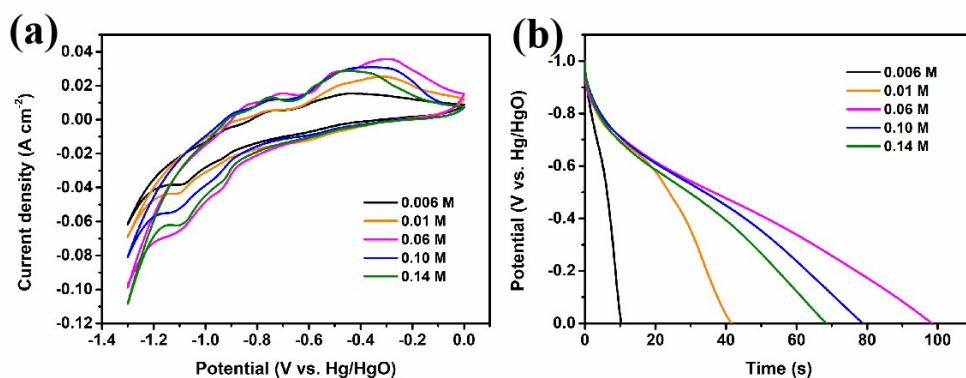

**Fig. S5.** The electrochemical properties of NQ@FeO<sub>x</sub>(OH)/IF electrode synthesised at different concentration of NQ solution. (a) CV curves at 10 mV s<sup>-1</sup>, (b) GCD curves at 20 mA cm<sup>-2</sup>.

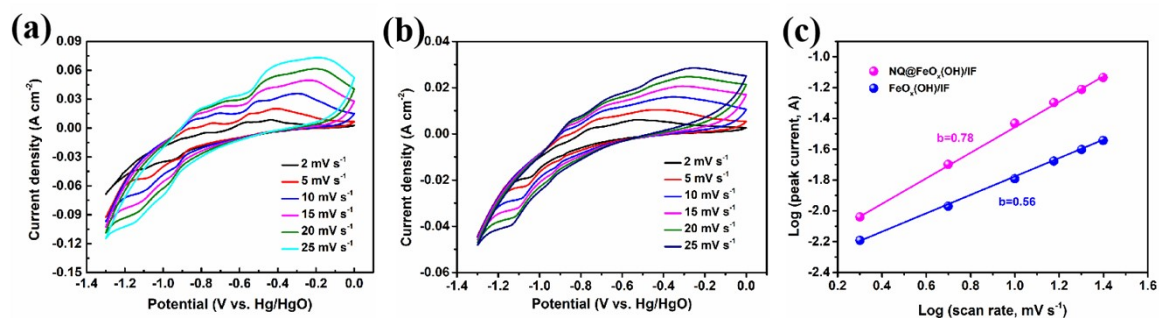

**Fig. S6.** CV curves of NQ@FeO<sub>x</sub>(OH)/IF and FeO<sub>x</sub>(OH)/IF (b) at different scan rates from 2 to 25 mV s<sup>-1</sup>, and (c) the corresponding b-values determined by the linear fitting of cathodic peak currents of CV curves with different scan rates.

**Table S1.** The comparison of the configuration and specific capacity of various aqueous Fe-based rechargeable batteries.

| Anode                                       | Electrolyte                         | Voltage       | Specific capacity                                      | Reference    |
|---------------------------------------------|-------------------------------------|---------------|--------------------------------------------------------|--------------|
| Fe <sub>3</sub> O <sub>4</sub> /rGO         | 8 M KOH + 0.01 M Na <sub>2</sub> S  | -1.2 ~ -0.4 V | 320 mAh g <sup>-1</sup>                                | [1]          |
| GE@CNT-Fe-Fe <sub>3</sub> C/CF              | 1 M KOH                             | -1 ~ 0 V      | 1.74 mAh cm <sup>-3</sup>                              | [2]          |
| C-Fe nanoparticles                          | 1 M KOH                             | -1.2 ~ 0 V    | 208 mAh g <sup>-1</sup>                                | [3]          |
| 3D-Fe/Fe <sub>2</sub> O <sub>3</sub> @C     | 1 M KOH                             | -1.1 ~ 0 V    | 3.07 mAh cm <sup>-2</sup>                              | [4]          |
| Fe <sub>2</sub> O <sub>3</sub> @GH          | 6 M KOH                             | -1.1 ~ -0.2 V | 304 mAh g <sup>-1</sup>                                | [5]          |
| Fe <sub>3</sub> S <sub>4</sub> @rGO         | 6 M KOH + 15 g L <sup>-1</sup> LiOH | 0.6 ~ 1.5 V   | 343.6 mAh g <sup>-1</sup>                              | [6]          |
| Fe <sub>3</sub> S <sub>4</sub> microspheres | 6 M KOH                             | 0.9 ~ 1.5 V   | 328.5 mAh g <sup>-1</sup>                              | [7]          |
| C@Fe-based/Bi/FF                            | 6 M KOH                             | -1.1 ~ -0.2 V | 2.83 mAh cm <sup>-2</sup>                              | [8]          |
| Zn-Fe <sub>2</sub> O <sub>3</sub> HPs       | 1 M KOH                             | -1.1 ~ 0 V    | 124 mAh g <sup>-1</sup>                                | [9]          |
| Fe <sub>3</sub> O <sub>4</sub> -NGC         | 6 M KOH                             | -1.2 ~ 0 V    | 308.1 mAh g <sup>-1</sup>                              | [10]         |
| Fe <sub>3</sub> O <sub>4</sub> @C MNAs      | 2 M KOH                             | -1.2 ~ -0.2 V | 292.4 mAh g <sup>-1</sup>                              | [11]         |
| NQ@FeOx(OH)/IF<br>(this work)               | 6 M KOH                             | -1 ~ 0 V      | 2.23 mAh cm <sup>-2</sup><br>348.6 mAh g <sup>-1</sup> | Present work |

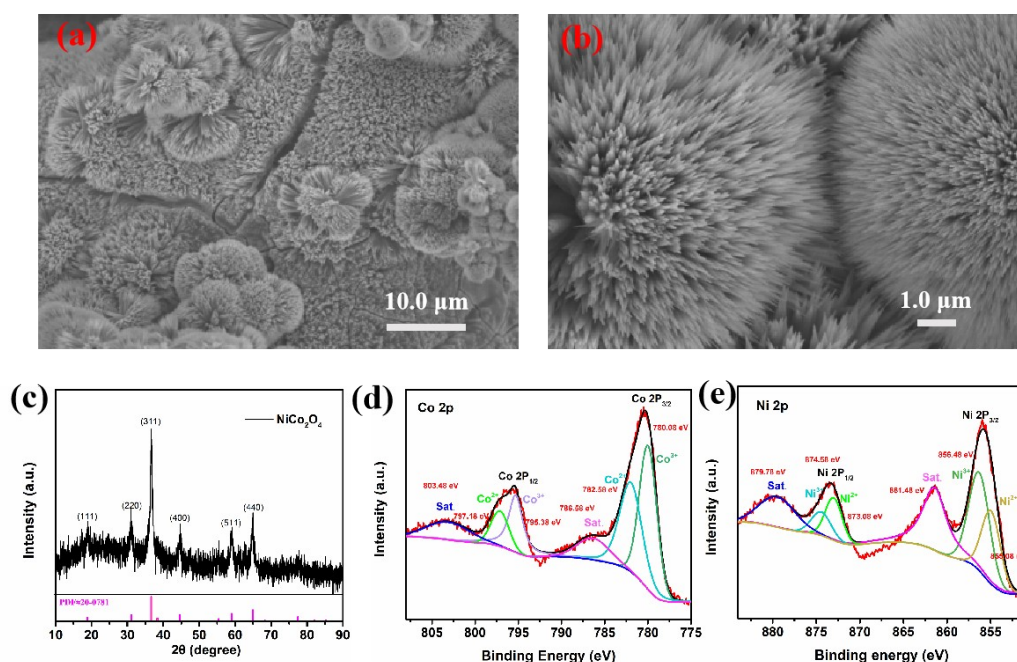

**Fig. S7.** The SEM (a-b), XRD pattern (c), Co XPS spectrum (d), and Ni 2p XPS spectrum (e) of  $\text{NiCo}_2\text{O}_4$  materials.

$\text{NiCo}_2\text{O}_4$  was fabricated as cathodic materials using the hydrothermal method, which was proved to be nanowires from the SEM (Fig. S7a-b). Fig. S7c shows the wide-angle X-ray diffraction (XRD) pattern of the  $\text{NiCo}_2\text{O}_4$  nanowires scrapped from  $\text{NiCo}_2\text{O}_4/\text{NF}$  electrodes. As observed in Fig. S7c, the well-defined diffraction peaks observed at  $2\theta$  values of  $18.9^\circ$ ,  $31.1^\circ$ ,  $36.6^\circ$ ,  $44.6^\circ$ ,  $59.1^\circ$ ,  $64.9^\circ$  and  $68.3^\circ$  could be successfully indexed to (111), (220), (311), (400), (511), and (440) plane reflections of the spinel  $\text{NiCo}_2\text{O}_4$  crystalline structure (JCPDF file no. 20-0781), with the standard peaks indicated by the red lines in Fig. S5c. The X-ray photoelectron spectroscopy (XPS) measurement is further carried out to study the chemical composition of the  $\text{NiCo}_2\text{O}_4$  nanowires, as shown in Fig. S7d-e. The Co 2p spectrum in Fig. S7d can be fitted into both  $\text{Co}^{2+}$  and  $\text{Co}^{3+}$  each accompanied with a shakeup satellite, and the Ni 2p spectrum in Fig. S7e can be also best fitted into  $\text{Ni}^{2+}$  and  $\text{Ni}^{3+}$  each accompanied with a shakeup satellite. These results indicate that the surface of the  $\text{NiCo}_2\text{O}_4$  nanostructures contains  $\text{Co}^{2+}$ ,  $\text{Co}^{3+}$ ,  $\text{Ni}^{2+}$ , and  $\text{Ni}^{3+}$ , which is in good agreement with previous results on  $\text{NiCo}_2\text{O}_4$ .

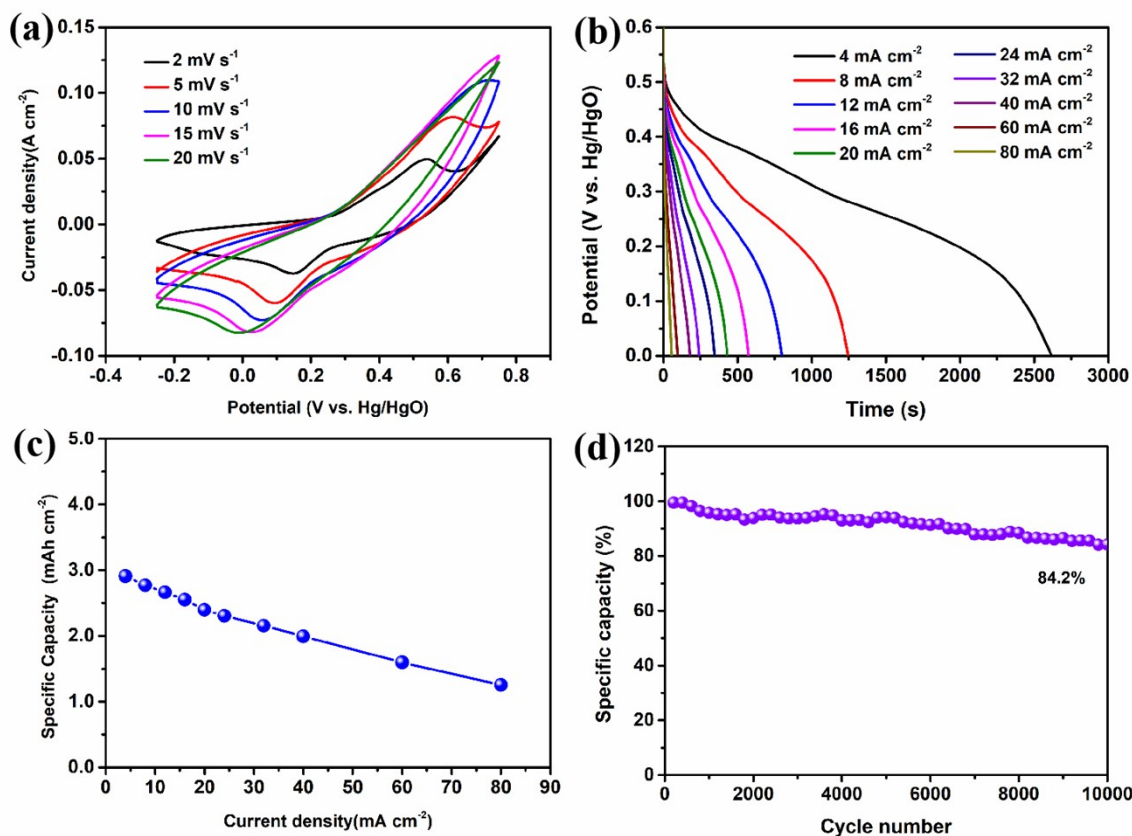

**Fig. S8.** The electrochemical measurement of NiCo<sub>2</sub>O<sub>4</sub> cathode. (a) the CV curves at different scan rates from 2 to 20 mV s<sup>-1</sup>, (b) the GCD curves at different current densities from 4 to 80 mA cm<sup>-2</sup>, (c) the corresponding specific capacities, (d) the cyclic stability at 60 mA cm<sup>-2</sup>.

The electrochemical properties of the NiCo<sub>2</sub>O<sub>4</sub>/NF electrode were tested using a three-electrode mode in a 6 M KOH solution. Fig. S8a is the cyclic voltammogram (CV) curves of the NiCo<sub>2</sub>O<sub>4</sub> nanowire sample. It is found that all the CV curves share a similar shape and the current increases with increasing the scan rates from 2 to 20 mV s<sup>-1</sup>. A distinct pair of redox peaks is obviously observed, which clearly reveals the pseudocapacitive characteristic of the electrode. The redox peaks can be attributed to the reaction of M–O/M–O–OH (M represents Ni and Co ions) associated with OH<sup>-</sup> anions. Also, GCD curves were carried out to study the electrochemical behaviors of NiCo<sub>2</sub>O<sub>4</sub> cathode at different current densities from 4 to 80 mA cm<sup>-2</sup> in Fig. S8b. A remarkable calculated areal capacity of 2.9 mAh cm<sup>-2</sup> is presented at a current density of 4 mA cm<sup>-2</sup> in Fig. S8c. The cyclic stability was also studied (Fig. S8d). Over 10000 cycles, the NiCo<sub>2</sub>O<sub>4</sub> electrode exhibits impressive durability (84.2%) at 60 mA cm<sup>-2</sup>.



**Table S2.** The comparison of the energy and power density of various aqueous Fe-based rechargeable batteries.

| Battery type                                                                                          | Specific capacity                                    | Energy density                                                                                           | Power density                                                                                          | Reference    |
|-------------------------------------------------------------------------------------------------------|------------------------------------------------------|----------------------------------------------------------------------------------------------------------|--------------------------------------------------------------------------------------------------------|--------------|
| GE@NiCoO/CF // GE@CNT-Fe-Fe <sub>3</sub> C/CF battery                                                 | 1.61 mAh cm <sup>-3</sup>                            | 1.28 mWh cm <sup>-3</sup> at 18.32 mW cm <sup>-3</sup>                                                   | 18.32 mW cm <sup>-3</sup>                                                                              | [2]          |
| Ni(OH) <sub>2</sub> MSs@NF //Fe <sub>2</sub> O <sub>3</sub> @GH battery                               | 127 mAh g <sup>-1</sup>                              | 203 Wh kg <sup>-1</sup> at 0.798 kW kg <sup>-1</sup>                                                     | 6.4 kW kg <sup>-1</sup>                                                                                | [5]          |
| NiO@C//Fe@C battery                                                                                   | 138.9 mAh g <sup>-1</sup>                            | 138 Wh kg <sup>-1</sup> at 0.61 kW kg <sup>-1</sup>                                                      | 14.5 kW kg <sup>-1</sup>                                                                               | [12]         |
| Ni-Co DH/OG// Fe <sub>3</sub> O <sub>4</sub> /FeOOH/OG battery                                        | 180 mAh g <sup>-1</sup>                              | 161.3 Wh kg <sup>-1</sup> at 5.7 kW kg <sup>-1</sup>                                                     | 43 kW kg <sup>-1</sup>                                                                                 | [13]         |
| Ni@CMFs//Fe@CMFs battery                                                                              | 148.8 mAh g <sup>-1</sup>                            | 116 Wh kg <sup>-1</sup> at 5.76 kW kg <sup>-1</sup>                                                      | 5.76 kW kg <sup>-1</sup>                                                                               | [14]         |
| NiO@C//Fe@C cell                                                                                      | 160 mAh g <sup>-1</sup>                              | 140.8 Wh kg <sup>-1</sup> at 0.65 kW kg <sup>-1</sup>                                                    | 15.6 kW kg <sup>-1</sup>                                                                               | [15]         |
| P-NiCo <sub>2</sub> O <sub>4</sub> NWAs// α-Fe <sub>2</sub> O <sub>3</sub> NRs battery                | 134.5 mAh g <sup>-1</sup>                            | 227 Wh kg <sup>-1</sup> at 0.59 kW kg <sup>-1</sup>                                                      | 23.4 kW kg <sup>-1</sup>                                                                               | [16]         |
| NiCoO//rGO/Fe <sub>2</sub> O <sub>3</sub> battery                                                     | 17.6 mAh cm <sup>-3</sup>                            | 961.6 mWh cm <sup>-3</sup>                                                                               | 19.9 mW cm <sup>-3</sup>                                                                               | [17]         |
| Ni(OH) <sub>2</sub> /CNT biscrolled yarn//Fe <sub>3</sub> O <sub>4</sub> /CNT biscrolled yarn battery | 0.053 mAh/cm                                         | 422 mWh cm <sup>-3</sup> at 753 mW cm <sup>-3</sup>                                                      | 7535 mW/cm <sup>-3</sup>                                                                               | [18]         |
| Ni(OH) <sub>2</sub> @NC/CTs// α-Fe <sub>2</sub> O <sub>3</sub> @NC/CTs battery                        | 105.6 mAh g <sup>-1</sup>                            | 155.4 Wh kg <sup>-1</sup> at 1.75 kW kg <sup>-1</sup>                                                    | 14 kW kg <sup>-1</sup>                                                                                 | [19]         |
| Ni/Fe battery (this work)                                                                             | 1.09 mAh cm <sup>-2</sup><br>147 mAh g <sup>-1</sup> | 235.2 Wh kg <sup>-1</sup> at 547 W kg <sup>-1</sup><br>19.6 Wh cm <sup>-3</sup> at 45 W cm <sup>-3</sup> | 5.4 kW kg <sup>-1</sup> at 82 Wh kg <sup>-1</sup><br>450 W cm <sup>-3</sup> at 6.8 Wh cm <sup>-3</sup> | Present work |



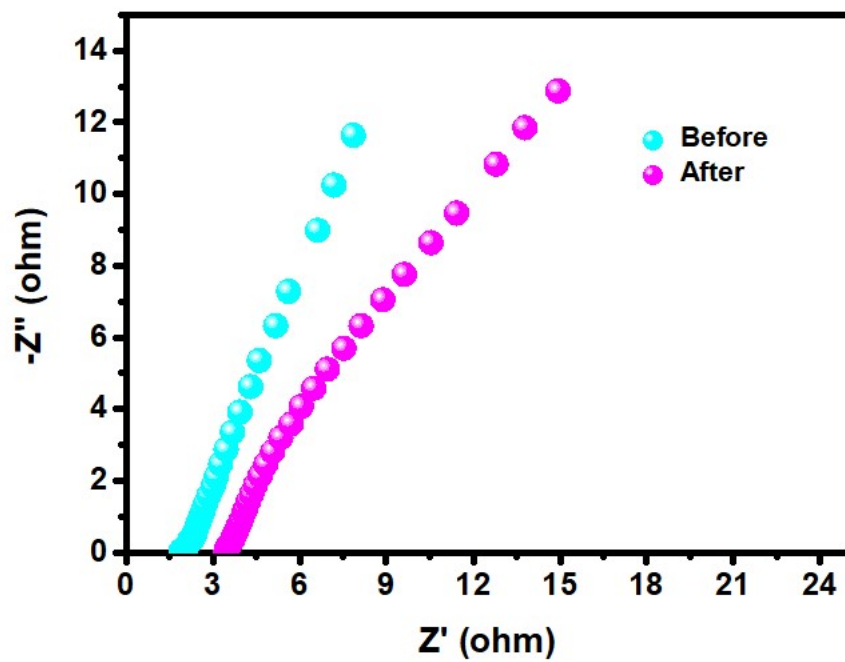

**Fig. S9.** The Nyquist plots of the 1st and 10,000th cycles for Ni/Fe batteries.

## References

- 1 W. K. Tan, K. Asami, K. Maegawa, R. Kumar, G. Kawamura, H. Muto and A. Matsuda, *Mater. Today Commun.*, 2020, **25**, 101540.
- 2 X. Li, T. Gao, Q. Liu, Y. Xu, J. Li and D. Xiao, *Mater. Chem. Front.*, 2021, **5**, 3636-3645.
- 3 X. Wu, H. Zhang, K. J. Huang and Z. Chen, *Nano Lett.*, 2020, **20**, 1700-1706.
- 4 X. Li, Y. Guo, T. Gao, P. Li, Z. Jin and D. Xiao, *ACS Appl. Mater. Interfaces*, 2021, **13**, 57411-57421.
- 5 F. Yin, P. Yang, X. Chen, Q. Yang and J. Xie, *Batteries Supercaps*, 2022, **5**, 202100289.
- 6 C. Wu, J. Zheng, J. Li, T. Jin, F. Wang, Q. Li, M. Chen, J. Qi, S. Gao and E. Shangguan, *J. Alloys Compd.*, 2022, **895**, 162593.
- 7 J. Li, J. Zheng, C. Wu, H. Zhang, T. Jin, F. Wang, Q. Li and E. Shangguan, *J. Alloys Compd.*, 2021, **874**, 159873.
- 8 X. Li and D. Xiao, *ChemElectroChem*, 2020, **7**, 3098-3105.
- 9 H. Shen, B. Lan, C. C. Li, J. Yan, J. Wang, Z. Wang, X. Hu, J. Liu and Y. Wu, *J. Alloys Compd.*, 2021, **879**, 160436.
- 10 C. Lai, L. Cheng, Y. Sun, K. Lee and B. Lin, *Appl. Surf. Sci.*, 2021, **563**, 150411.
- 11 T. Zhang, C. Yang, S. Sun, Y. Huang, G. Meng, A. Han and J. Liu, *Sci. China Mater.*, 2021, **64**, 1105-1113.
- 12 H. Zhang, Y. Liu, T. Meng, L. Ma, J. Zhu, M. Xu, C. M. Li, W. Zhou and J. Jiang, *ACS Sustainable Chem. Eng.*, 2019, **7**, 10995-11003.
- 13 Z. Qin, Y. Song, H. Y. Shi, C. Li, D. Guo, X. Sun and X. X. Liu, *Chem. Eng. J.*, 2020, **400**, 125874.
- 14 L. Ma, Y. Xu, Y. Liu, H. Zhang, J. Yao, N. Li, C. M. Li, W. Zhou and J. Jiang, *ACS Sustainable Chem. Eng.*, 2019, **7**, 17919-17928.
- 15 H. Zhang, L. Li, Y. Liu, T. Meng, L. Ma, M. Xu, J. Zhu, C. M. Li and J. Jiang, *ACS Appl. Mater. Interfaces*, 2019, **11**, 42365-42374.
- 16 W. Qiu, H. Xiao, W. He, Y. Li and Y. Tong, *Inorg. Chem. Front.*, 2018, **5**, 1805-1815.
- 17 Y. Guo, C. Chen, Y. Li, Y. Chen, S. Li, T. Gao, H. Liu, W. Liu, D. Xiao and X. Li, *Appl. Surf. Sci.*, 2023, **623**, 156995.
- 18 J. H. Choi, J. Kim, J. H. Noh, G. Lee, C. Yoon, U. C. Kim, I. H. Jang, H. Y. Kim and C. Choi, *Int. J. Mol. Sci.*, 2023, **24**, 1067.
- 19 W. Li, Q. Xu, D. Kong, H. Yang, T. Xu, H. Wang, J. Zang, S. Huang, X. Li and Y. Wang, *Chem. Eng. J.*, 2023, **452**, 139251.
